# Supplementary material for: Isotopic variations in surface waters and groundwaters of an extremely arid basin and their responses to climate change
Source: Copernicus journal article supplement (doi:10.5194/hess-27-4019-2023), 2023-11-09
Supplement: Supplementary file 1 [file hess-27-4019-2023-supplement.pdf]

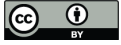

*Supplement of*

## **Isotopic variations in surface waters and groundwaters of an extremely arid basin and their responses to climate change**

**Yu Zhang et al.**

*Correspondence to:* Hongbing Tan (tan815@sina.com)

The copyright of individual parts of the supplement might differ from the article licence.



| Watershed     | Water type           |        | $\delta^{18}\text{O}$ | $\delta\text{D}$ | d-excess | $\delta^{18}\text{O}$ | $\delta\text{D}$ | d-excess | $^3\text{H}$ | Source |
|---------------|----------------------|--------|-----------------------|------------------|----------|-----------------------|------------------|----------|--------------|--------|
|               |                      |        | (‰)                   | (‰)              | (‰)      | (‰)                   | (‰)              | (‰)      | (‰)          |        |
|               |                      |        | Wet season            |                  |          | Dry season            |                  |          |              |        |
| Golmud        | Surface water        | Mean   | 1.24                  | 3.58             | 7.50     | 0.47                  | 3.42             | 1.99     | 4.50         |        |
|               |                      | SD     |                       |                  |          |                       |                  |          |              |        |
|               | Confined groundwater | Mean   | -7.54                 | -53.5            | 6.80     | -8.77                 | -55.5            | 14.67    | 10.59        |        |
|               |                      | Max    | -6.51                 | -49.6            | 11.13    | -8.63                 | -55.2            | 15.90    | 12.76        |        |
|               |                      | Min    | -8.58                 | -57.5            | 2.47     | -8.91                 | -55.9            | 13.79    | 8.42         |        |
|               |                      | SD     | 1.04                  | 3.95             | 4.33     | 0.11                  | 0.26             | 0.90     | 2.17         |        |
|               | Phreatic groundwater | Mean   | -8.87                 | -58.8            | 12.23    | -9.77                 | -65.1            | 13.14    | 14.03        |        |
|               |                      | Max    | -6.62                 | -47.5            | 20.48    | -7.13                 | -49.6            | 22.10    | 16.66        |        |
|               |                      | Min    | -11.25                | -69.5            | 5.46     | -11.94                | -77.7            | 5.78     | 12.16        |        |
|               |                      | SD     | 1.07                  | 4.83             | 4.10     | 0.98                  | 5.14             | 3.43     | 1.18         |        |
|               | Confined groundwater | Mean   | -10.07                | -68.5            | 12.03    | -10.30                | -68.7            | 13.71    | 6.50         |        |
|               |                      | Max    | -8.22                 | -61.5            | 17.70    | -9.27                 | -62.2            | 18.08    | 10.82        |        |
|               |                      | Min    | -11.99                | -81.7            | 1.98     | -11.11                | -74.3            | 11.60    | B.D.         |        |
|               |                      | SD     | 0.90                  | 4.60             | 3.63     | 0.53                  | 3.08             | 1.65     | 3.52         |        |
| Surface water | Mean                 | -10.84 | -74.0                 | 12.71            | -10.84   | -72.2                 | 13.61            | 1.93     |              |        |
|               | Max                  | -9.87  | -66.6                 | 15.36            | -9.57    | -65.9                 | 19.48            | 8.54     |              |        |
|               | Min                  | -12.12 | -85.0                 | 1.49             | -11.53   | -77.8                 | 0.00             | B.D.     |              |        |
|               | SD                   | 0.61   | 4.18                  | 3.40             | 0.53     | 3.50                  | 4.14             | 3.05     |              |        |
| Surface water | Mean                 | -9.95  | -69.0                 | 10.58            | -9.88    | -69.7                 | 9.34             | 7.64     |              |        |
|               | Max                  | -7.35  | -59.6                 | 16.56            | -9.08    | -66.0                 | 13.21            | 9.57     |              |        |
|               | Min                  | -11.36 | -74.3                 | -0.80            | -11.01   | -74.9                 | 6.64             | 6.51     |              |        |
|               | SD                   | 1.84   | 6.69                  | 8.05             | 0.83     | 3.80                  | 2.81             | 1.37     |              |        |

| Watershed            | Water type           |               | $\delta^{18}\text{O}$ | $\delta\text{D}$ | d-excess | $\delta^{18}\text{O}$ | $\delta\text{D}$ | d-excess | $^3\text{H}$ | Source |      |
|----------------------|----------------------|---------------|-----------------------|------------------|----------|-----------------------|------------------|----------|--------------|--------|------|
|                      |                      |               | (‰)                   | (‰)              | (‰)      | (‰)                   | (‰)              | (‰)      | (TU)         |        |      |
|                      |                      |               | Wet season            |                  |          | Dry season            |                  |          |              |        |      |
|                      | Phreatic groundwater | Mean          | -11.74                | -78.3            | 15.69    | -11.00                | -74.9            | 13.07    | 3.88         |        |      |
|                      |                      | Max           | -10.66                | -70.3            | 16.86    | -7.89                 | -62.5            | 17.35    | 13.08        |        |      |
|                      |                      | $N_W=15$      | Min                   | -12.70           | -87.4    | 14.22                 | -12.04           | -80.0    | 0.58         | B.D.   |      |
|                      |                      | $N_D=11$      | SD                    | 0.47             | 3.86     | 0.71                  | 1.24             | 5.8      | 4.86         | 4.83   |      |
|                      | Confined groundwater | Mean          | -12.01                | -80.9            | 15.22    | -11.24                | -76.28           | 13.63    | 2.16         |        |      |
|                      |                      | Max           |                       |                  |          |                       |                  |          |              |        |      |
|                      |                      | $N_W=1$       | Min                   |                  |          |                       |                  |          |              |        |      |
|                      |                      | $N_D=1$       | SD                    |                  |          |                       |                  |          |              |        |      |
|                      | Qaidam               | Surface water | Mean                  | -8.79            | -61.6    | 8.74                  | -9.63            | -67.2    | 9.78         | 9.88   |      |
|                      |                      |               | Max                   | -7.97            | -58.5    | 14.11                 | -8.16            | -60.3    | 16.15        | 10.66  |      |
|                      |                      |               | $N_W=5$               | Min              | -9.47    | -65.8                 | 4.72             | -11.66   | -77.1        | 4.98   | 9.12 |
|                      |                      |               | $N_D=3$               | SD               | 0.56     | 3.00                  | 3.65             | 1.49     | 7.2          | 4.69   | 0.63 |
| Phreatic groundwater |                      | Mean          | -9.53                 | -67.1            | 9.09     | -10.47                | -71.9            | 11.89    | 8.43         |        |      |
|                      |                      | Max           | -9.05                 | -65.2            | 10.82    | -9.02                 | -65.1            | 15.46    | 8.76         |        |      |
|                      |                      | $N_W=6$       | Min                   | -9.94            | -68.7    | 7.16                  | -11.64           | -77.7    | 7.11         | 7.95   |      |
|                      |                      | $N_D=4$       | SD                    | 0.26             | 1.28     | 1.26                  | 1.04             | 5.29     | 3.11         | 0.35   |      |
| Confined groundwater |                      | Mean          |                       |                  |          |                       |                  |          |              |        |      |
|                      |                      | Max           |                       |                  |          |                       |                  |          |              |        |      |
|                      |                      | $N_W=0$       | Min                   |                  |          |                       |                  |          |              |        |      |
|                      |                      | $N_D=0$       | SD                    |                  |          |                       |                  |          |              |        |      |
| Qrhanwusu            | Mean                 | -9.80         | -61.6                 | 16.83            | -11.21   | -74.4                 | 15.24            |          |              |        |      |
|                      | Max                  |               |                       |                  | -10.78   | -71.6                 | 16.24            |          |              |        |      |



| Watershed                  | Water type           |      | $\delta^{18}\text{O}$ | $\delta\text{D}$ | d-excess | $\delta^{18}\text{O}$ | $\delta\text{D}$ | d-excess | $^3\text{H}$ | Source |
|----------------------------|----------------------|------|-----------------------|------------------|----------|-----------------------|------------------|----------|--------------|--------|
|                            |                      |      | (‰)                   | (‰)              | (‰)      | (‰)                   | (‰)              | (‰)      | (‰)          |        |
|                            |                      |      | Wet season            |                  |          | Dry season            |                  |          |              |        |
| Bayin                      | Surface water        | Mean | -8.41                 | -56.7            | 10.66    | -9.20                 | -59.5            | 14.10    | 16.17        |        |
|                            |                      | Max  | -6.60                 | -50.8            | 15.72    | -8.71                 | -56.9            | 15.90    | 17.80        |        |
|                            |                      | Min  | -9.44                 | -60.1            | -4.30    | -9.54                 | -61.3            | 11.99    | 14.00        |        |
|                            |                      | SD   | 0.81                  | 2.62             | 4.85     | 0.26                  | 1.47             | 1.21     | 1.60         |        |
|                            | Phreatic groundwater | Mean | -9.04                 | -59.6            | 12.74    | -9.49                 | -61.4            | 14.49    | 9.89         |        |
|                            |                      | Max  | -6.50                 | -42.0            | 17.78    | -8.41                 | -54.4            | 18.81    | 15.60        |        |
|                            |                      | Min  | -10.60                | -71.1            | 8.84     | -10.33                | -69.1            | 8.46     | 1.30         |        |
|                            |                      | SD   | 0.71                  | 5.26             | 1.82     | 0.56                  | 3.76             | 3.24     | 3.43         |        |
|                            | Confined groundwater | Mean | -9.36                 | -61.8            | 13.06    | -9.55                 | -60.3            | 16.09    | 7.95         |        |
|                            |                      | Max  | -8.82                 | -58.3            | 14.04    | -9.24                 | -56.2            | 17.70    | 11.90        |        |
|                            |                      | Min  | -10.08                | -66.6            | 12.26    | -10.17                | -66.6            | 14.69    | 3.70         |        |
|                            |                      | SD   | 0.46                  | 3.12             | 0.68     | 0.37                  | 3.84             | 1.38     | 3.64         |        |
| Eastern Kunlun Mountations | Rain water           | Mean | -7.06                 | -39.1            | 17.32    |                       |                  |          |              |        |
|                            |                      | Max  | 2.55                  | 30.5             | 38.60    |                       |                  |          |              |        |
|                            |                      | Min  | -23.38                | -158.6           | -6.96    |                       |                  |          |              |        |
|                            |                      | SD   | 4.73                  | 35.95            | 8.44     |                       |                  |          |              |        |
| Snowmelt                   | Mean                 |      |                       |                  | -13.64   | -87.7                 | 21.43            |          |              |        |
|                            | Max                  |      |                       |                  | -11.30   | -61.7                 | 31.65            |          |              |        |
|                            | Min                  |      |                       |                  | -19.30   | -152.0                | 2.38             |          |              |        |
|                            | SD                   |      |                       |                  | 2.92     | 33.33                 | 10.23            |          |              |        |
| Qilian Mountations         | Rain water           | Mean | -7.80                 | -51.8            | 10.62    |                       |                  |          |              |        |
|                            |                      | Max  | 0.27                  | 13.8             | 20.89    |                       |                  |          |              |        |

Zhu et al., 2015

| Watershed | Water type |      | $\delta^{18}\text{O}$ | $\delta\text{D}$ | d-excess | $\delta^{18}\text{O}$ | $\delta\text{D}$ | d-excess | $^3\text{H}$ | Source            |
|-----------|------------|------|-----------------------|------------------|----------|-----------------------|------------------|----------|--------------|-------------------|
|           |            |      | (‰)                   | (‰)              | (‰)      | (‰)                   | (‰)              | (‰)      | (TU)         |                   |
|           |            |      | Wet season            |                  |          | Dry season            |                  |          |              |                   |
|           |            | Min  | -17.24                | -125.2           | 1.31     |                       |                  |          |              |                   |
|           |            | SD   | 5.13                  | 40.59            | 4.90     |                       |                  |          |              |                   |
|           |            | Mean |                       |                  |          | -11.50                | -78.4            | 13.56    |              |                   |
|           | Snowmelt   | Max  |                       |                  |          | -2.19                 | 32.4             | 49.92    |              |                   |
|           | N=7        | Min  |                       |                  |          | -20.05                | -141.7           | -15.89   |              | Yang et al., 2021 |
|           |            | SD   |                       |                  |          | 5.59                  | 53.86            | 18.87    |              |                   |

$N_{\text{W/D}}$  represents the number of samplings in wet/dry season;  $N$  represents the number of samplings of rain water or snowmelt; **B.D.** represents below the detection limit.

## References

Yang, N., Zhou, P., Wang, G., Zhang, B., Shi, Z., Liao, F., Li, B., Chen, X., Guo, L., Dang, X., and Gu, X.: Hydrochemical and isotopic interpretation of interactions between surface water and groundwater in Delingha, Northwest China, *J. Hydrol.*, 598, 126243, <https://doi.org/10.1016/j.jhydrol.2021.126243>, 2021.

Zhu, J., Chen, H., and Gong, G.: Hydrogen and oxygen isotopic compositions of precipitation and its water vapor sources in Eastern Qaidam Basin, *Environmental Science*, 36(8), 2784-2790, <https://doi.org/10.13227/j.hjcx.2015.08.008>, 2015 (in Chinese with English abstract).

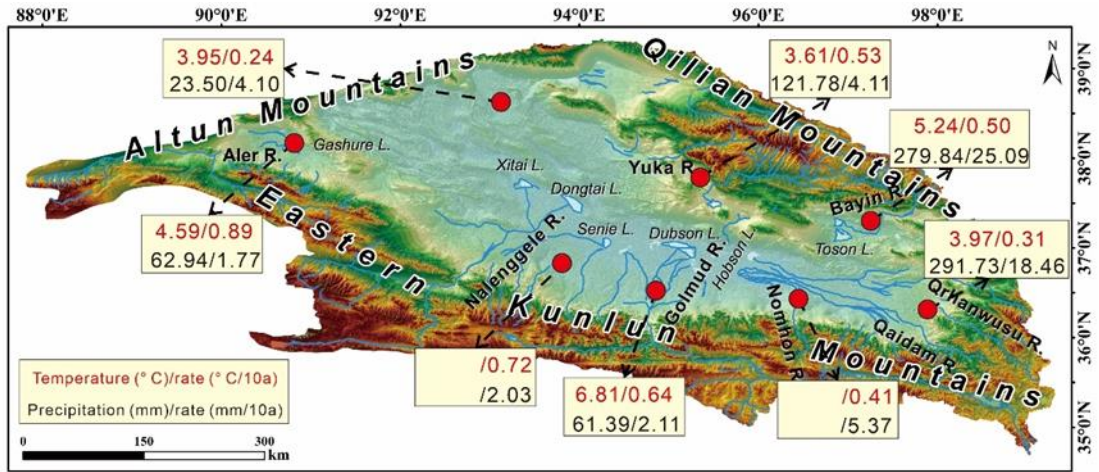

**Figure S1.** Average annual temperature and precipitation of each meteorological station in the Qaidam Basin since 2005 and rise in temperature and precipitation since 1961 (The rate data are from Yang et al., 2014).

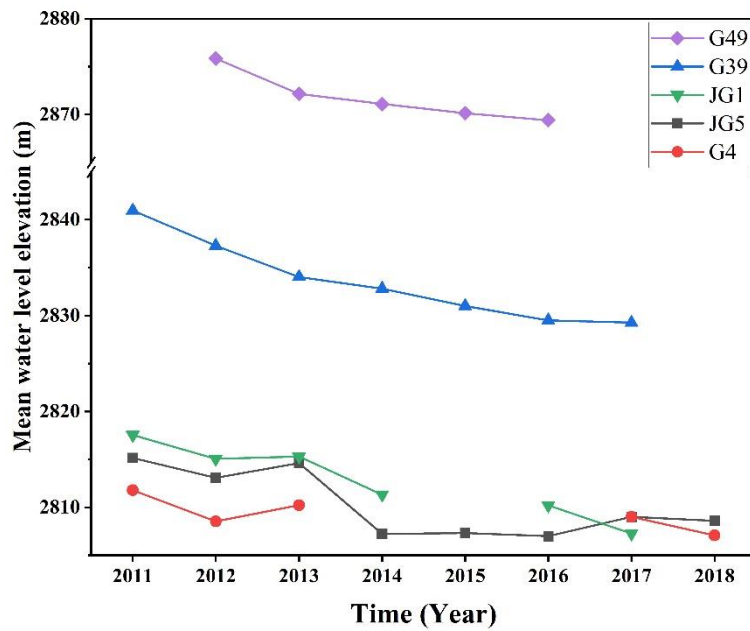

**Figure S2.** Changes in groundwater level in the Golmud River from 2011 to 2018.
